# Supplementary material for: Ipragliflozin, a sodium–glucose cotransporter 2 inhibitor, reduces bodyweight and fat mass, but not muscle mass, in Japanese type 2 diabetes patients treated with insulin: A randomized clinical trial
Source: PubMed Central journal article supplement — J Diabetes Investig. 2019 Jan 21;10(4):1012–21. doi: 10.1111/jdi.12985 (PMC6626939; doi:10.1111/jdi.12985), 2019-01-21
Supplement: JDI-10-1012-s001.pdf [file JDI-10-1012-s001.pdf]

## Supplemental Fig. S1

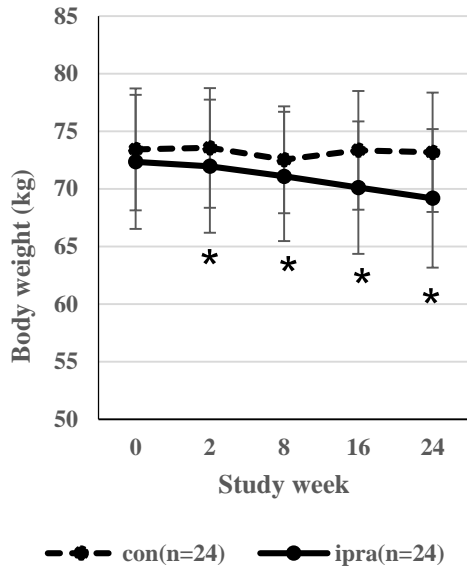

### Supplemental Fig. S1. Changes in body weight over study period.

Values are least square mean  $\pm$  SE. The *P*-values indicate comparisons of changes between Ipra group and Control group according to ANOVA adjusted for sex. \*, *P* < 0.05.
