# Supplementary material for: Ipragliflozin, a sodium–glucose cotransporter 2 inhibitor, reduces bodyweight and fat mass, but not muscle mass, in Japanese type 2 diabetes patients treated with insulin: A randomized clinical trial
Source: PubMed Central journal article supplement — J Diabetes Investig. 2019 Jan 21;10(4):1012–21. doi: 10.1111/jdi.12985 (PMC6626939; doi:10.1111/jdi.12985), 2019-01-21
Supplement: JDI-10-1012-s002.pdf [file JDI-10-1012-s002.pdf]

## Supplemental Fig. S2

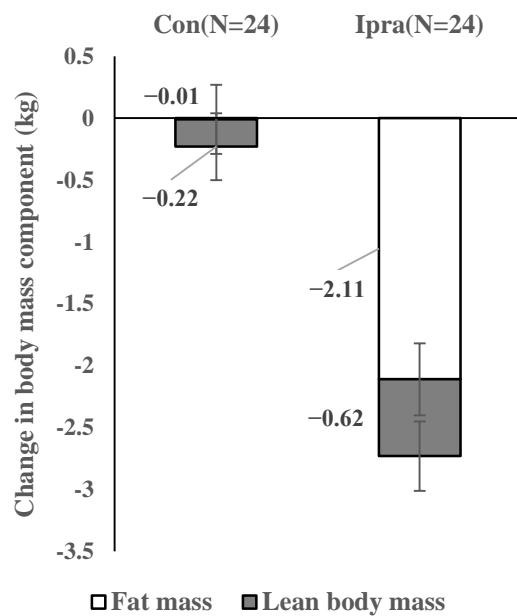

**Supplemental Fig. S2. Changes in body composition measured with DEXA.**  
Values are least square mean  $\pm$  SE.
