# Supplementary material for: Ipragliflozin, a sodium–glucose cotransporter 2 inhibitor, reduces bodyweight and fat mass, but not muscle mass, in Japanese type 2 diabetes patients treated with insulin: A randomized clinical trial
Source: PubMed Central journal article supplement — J Diabetes Investig. 2019 Jan 21;10(4):1012–21. doi: 10.1111/jdi.12985 (PMC6626939; doi:10.1111/jdi.12985), 2019-01-21
Supplement: JDI-10-1012-s003.pdf [file JDI-10-1012-s003.pdf]

# Supplemental Fig. S3

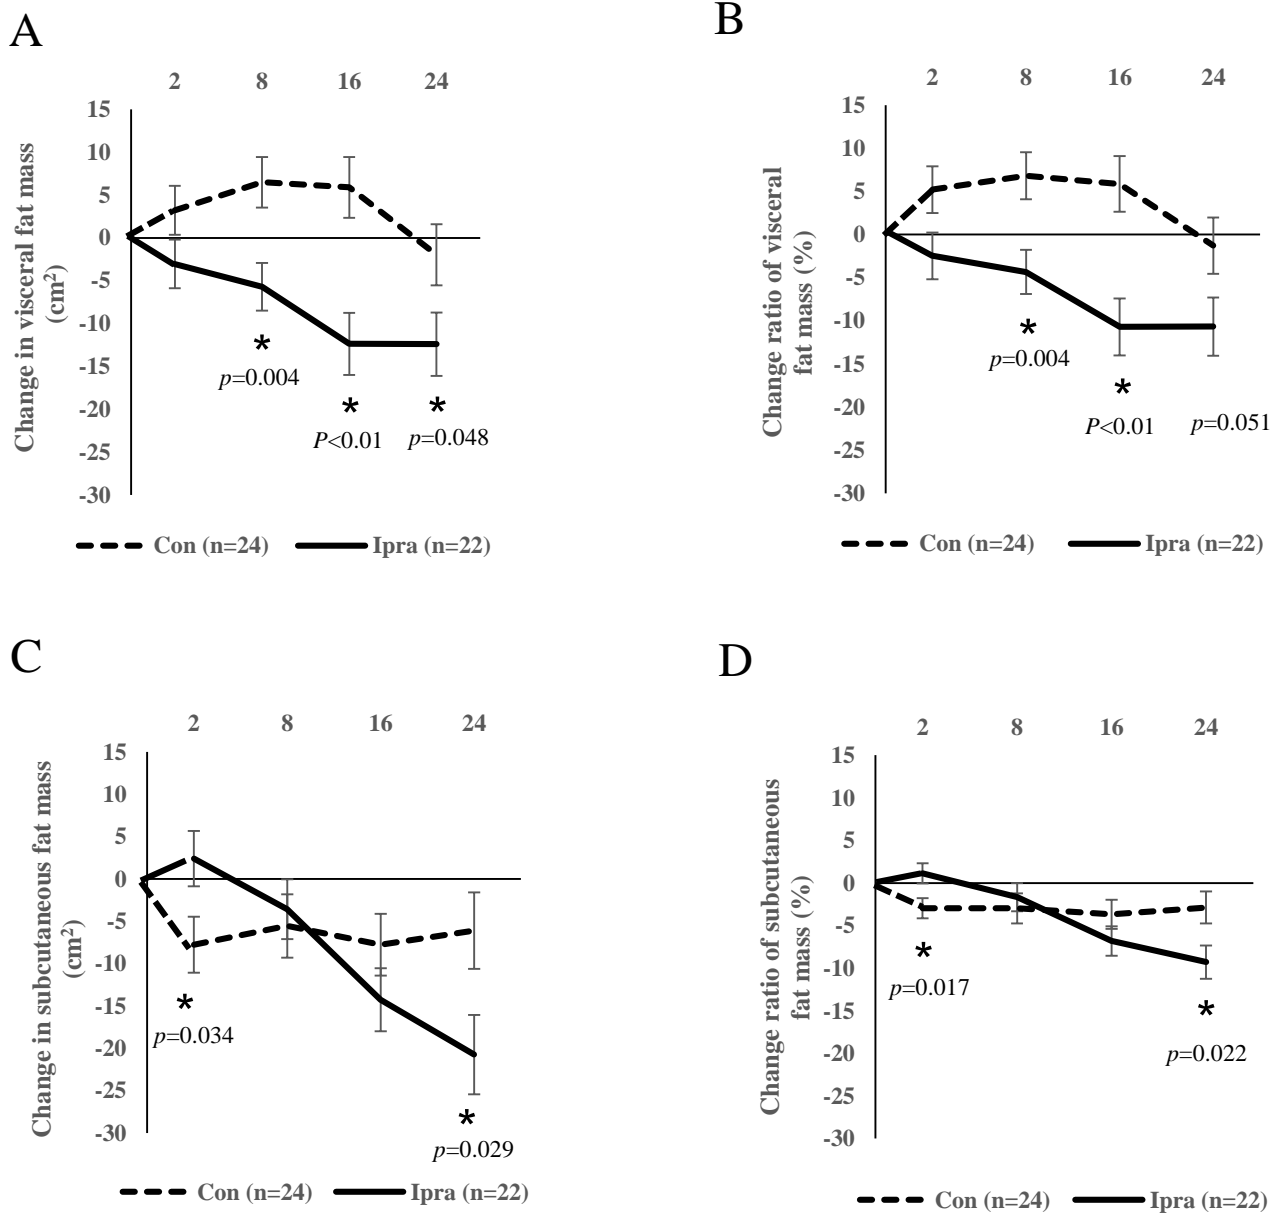

## Supplemental Fig. S3. Visceral and subcutaneous fat evaluated with abdominal BIA.

A Change in visceral fat mass from 0 to 24 weeks.

B Percent change in visceral fat mass from 0 to 24 weeks.

C Change in subcutaneous fat mass from 0 to 24 weeks.

D Percent change in subcutaneous fat mass from 0 to 24 weeks.

Values are least square mean  $\pm$  SE. The P-values indicate comparisons of changes between Ipra group and Control group according to ANCOVA adjusted for sex. \*, P < 0.05.
