# Supplementary material for: Ipragliflozin, a sodium–glucose cotransporter 2 inhibitor, reduces bodyweight and fat mass, but not muscle mass, in Japanese type 2 diabetes patients treated with insulin: A randomized clinical trial
Source: PubMed Central journal article supplement — J Diabetes Investig. 2019 Jan 21;10(4):1012–21. doi: 10.1111/jdi.12985 (PMC6626939; doi:10.1111/jdi.12985), 2019-01-21
Supplement: JDI-10-1012-s004.pdf [file JDI-10-1012-s004.pdf]

# Supplemental Table S1

Major adverse events during the clinical trial

| Events                      | Number of patients (%) | Number of patients (%)       |
|-----------------------------|------------------------|------------------------------|
|                             | Control group (n = 24) | Ipragliflozin group (n = 24) |
| Any adverse event           | 20 (83.3)              | 21 (87.5)                    |
| Hypoglycemia                | 10 (41.7)              | 13 (54.2)                    |
| Exanthema/skin itching      | 4 (16.7)               | 10 (41.7)                    |
| Muscle/joint pain           | 7 (29.2)               | 5 (20.8)                     |
| Upper respiratory infection | 4 (16.7)               | 5 (20.8)                     |
| Urinary tract infection     | 3 (12.5)               | 4 (16.7)                     |
| Dehydration                 | 3 (12.5)               | 4 (16.7)                     |
| Genital itching             | 0 (0)                  | 3 (12.5)                     |
| Liver dysfunction           | 0 (0)                  | 1 (4.2)                      |
| Cholecystitis/Cholangitis   | 0 (0)                  | 2 (8.3)                      |
| Orthostatic hypotension     | 0 (0)                  | 1 (4.2)                      |
| Candida vaginitis           | 0 (0)                  | 1 (4.2)                      |
| Other                       | 7 (29.2)               | 10 (41.7)                    |

Hypoglycemia, dehydration, urinary tract infection, exanthema and orthostatic hypotension were predefined as adverse events.
