# Supplementary material for: Ipragliflozin, a sodium–glucose cotransporter 2 inhibitor, reduces bodyweight and fat mass, but not muscle mass, in Japanese type 2 diabetes patients treated with insulin: A randomized clinical trial
Source: PubMed Central journal article supplement — J Diabetes Investig. 2019 Jan 21;10(4):1012–21. doi: 10.1111/jdi.12985 (PMC6626939; doi:10.1111/jdi.12985), 2019-01-21
Supplement: JDI-10-1012-s005.pdf [file JDI-10-1012-s005.pdf]

## Supplemental Table S2

Dietary preferences according to visual analog scale (maximum 100 mm)

|                                                   | Control group |             |            | Ipra group                      |             |            | Difference<br>in change<br>(95% CI) | P<br>value |
|---------------------------------------------------|---------------|-------------|------------|---------------------------------|-------------|------------|-------------------------------------|------------|
|                                                   | (Insulin)     |             |            | (Insulin + Ipragliflozin 50 mg) |             |            |                                     |            |
|                                                   | Baseline      | Week 24     | Change     | Baseline                        | Week 24     | Change     |                                     |            |
| Eager to eat                                      |               |             |            |                                 |             |            |                                     |            |
| greasy food                                       | 46.2 ± 26.7   | 47.9 ± 22.3 | 1.8 ± 4.2  | 48.1 ± 24.5                     | 46.1 ± 23.4 | -2.4 ± 4.5 | -4.3<br>(-16.6, 8.1)                | 0.492      |
| sweets                                            | 53.8 ± 30.3   | 52.2 ± 19.8 | -1.8 ± 4.9 | 55.2 ± 26.5                     | 56.2 ± 24.3 | -0.2 ± 5.2 | 1.6<br>(-12.8, 15.9)                | 0.828      |
| Western style diet                                | 44.3 ± 27.3   | 49.1 ± 23.6 | 4.7 ± 4.0  | 46.4 ± 22.5                     | 46.2 ± 20.4 | -0.3 ± 4.2 | -5.0<br>(-16.6, 6.6)                | 0.391      |
| Japanese style diet                               | 63.5 ± 20.6   | 59.8 ± 18.9 | -3.6 ± 3.1 | 67.3 ± 17.2                     | 61.5 ± 19.1 | -5.1 ± 3.2 | -1.6<br>(-10.4, 7.3)                | 0.724      |
| meat/protein than<br>carbohydrate/starchy<br>food | 55.0 ± 20.8   | 48.8 ± 24.6 | -5.4 ± 5.0 | 44.2 ± 19.2                     | 46.4 ± 20.1 | 3.7 ± 5.2  | 9.0<br>(-5.6, 23.7)                 | 0.219      |
| Hunger                                            | 46.5 ± 30.6   | 42.9 ± 26.6 | -6.3 ± 6.8 | 60.3 ± 23.8                     | 64.9 ± 26.1 | 3.7 ± 7.1  | 10.0<br>(-9.8, 29.8)                | 0.315      |

Dietary preferences were evaluated with a questionnaire that used a visual analogue scale (max 100 mm). Values are least square mean ± SE (mm). The P-values indicate comparisons of changes between Ipra group and Control group according to ANCOVA adjusted for sex.
