# Supplementary material for: Ipragliflozin, a sodium–glucose cotransporter 2 inhibitor, reduces bodyweight and fat mass, but not muscle mass, in Japanese type 2 diabetes patients treated with insulin: A randomized clinical trial
Source: PubMed Central journal article supplement — J Diabetes Investig. 2019 Jan 21;10(4):1012–21. doi: 10.1111/jdi.12985 (PMC6626939; doi:10.1111/jdi.12985), 2019-01-21
Supplement: JDI-10-1012-s006.pdf [file JDI-10-1012-s006.pdf]

# Supplemental Table S3

Changes in body composition assessed with BIA and DEXA, adjusted for sex and insulin dose.

|                                  | Control group<br>Change | Ipra group<br>Change | Difference<br>in change (95% CI) | P value |
|----------------------------------|-------------------------|----------------------|----------------------------------|---------|
| <b>Body weight (kg)</b>          |                         |                      |                                  |         |
| Model 1                          | -0.22 ± 0.38            | -2.78 ± 0.40         | -2.56 (-3.67, -1.45)             | <0.0001 |
| Model 2                          | -0.34 ± 0.37            | -2.65 ± 0.39         | -2.31 (-3.41, -1.22)             | 0.0001  |
| Model 3                          | -0.22 ± 0.37            | -2.78 ± 0.38         | -2.56 (-3.63, -1.49)             | <0.0001 |
| Model 4                          | -0.2 ± 0.38             | -2.81 ± 0.4          | -2.61 (-3.71, -1.50)             | <0.0001 |
| Model 5                          | -0.34 ± 0.36            | -2.59 ± 0.37         | -2.25 (-3.30, -1.21)             | <0.0001 |
| <b>Fat mass with DEXA (kg)</b>   |                         |                      |                                  |         |
| Model 1                          | -0.01 ± 0.27            | -2.07 ± 0.28         | -2.06 (-2.85, -1.26)             | <0.0001 |
| Model 2                          | -0.03 ± 0.28            | -2.10 ± 0.30         | -2.07 (-2.90, -1.23)             | <0.0001 |
| Model 3                          | -0.01 ± 0.28            | -2.11 ± 0.29         | -2.10 (-2.92, -1.28)             | <0.0001 |
| Model 4                          | -0.02 ± 0.28            | -2.11 ± 0.29         | -2.09 (-2.91, -1.27)             | <0.0001 |
| Model 5                          | -0.08 ± 0.27            | -2.00 ± 0.28         | -1.92 (-2.71, -1.13)             | <0.0001 |
| <b>Lean mass with DEXA (kg)</b>  |                         |                      |                                  |         |
| Model 1                          | -0.22 ± 0.27            | -0.60 ± 0.29         | -0.38 (-1.17, 0.40)              | 0.332   |
| Model 2                          | -0.33 ± 0.25            | -0.50 ± 0.25         | -0.18 (-0.90, 0.55)              | 0.626   |
| Model 3                          | -0.21 ± 0.25            | -0.63 ± 0.25         | -0.42 (-1.13, 0.29)              | 0.239   |
| Model 4                          | -0.18 ± 0.25            | -0.67 ± 0.26         | -0.49 (-1.22, 0.24)              | 0.181   |
| Model 5                          | -0.26 ± 0.27            | -0.55 ± 0.28         | -0.29 (-1.07, 0.50)              | 0.467   |
| <b>Fat mass with BIA (kg)</b>    |                         |                      |                                  |         |
| Model 1                          | -0.27 ± 0.46            | -2.21 ± 0.48         | -1.94 (-3.28, -0.60)             | 0.0056  |
| Model 2                          | -0.37 ± 0.46            | -2.11 ± 0.48         | -1.74 (-3.10, -0.38)             | 0.013   |
| Model 3                          | -0.27 ± 0.46            | -2.21 ± 0.47         | -1.94 (-3.27, -0.62)             | 0.005   |
| Model 4                          | -0.26 ± 0.47            | -2.23 ± 0.48         | -1.98 (-3.33, -0.62)             | 0.005   |
| Model 5                          | -0.39 ± 0.44            | -2.01 ± 0.46         | -1.61 (-2.91, -0.32)             | 0.016   |
| <b>Muscle mass with BIA (kg)</b> |                         |                      |                                  |         |
| Model 1                          | -0.05 ± 0.33            | -0.56 ± 0.34         | -0.61 (-1.56, -0.35)             | 0.206   |
| Model 2                          | 0.03 ± 0.34             | -0.53 ± 0.35         | -0.56 (-1.55, 0.42)              | 0.255   |
| Model 3                          | 0.05 ± 0.33             | -0.55 ± 0.35         | -0.61 (-1.57, 0.36)              | 0.211   |
| Model 4                          | 0.06 ± 0.33             | -0.56 ± 0.35         | -0.62 (-1.59, 0.35)              | 0.203   |
| Model 5                          | 0.06 ± 0.34             | -0.57 ± 0.35         | -0.64 (-1.62, 0.35)              | 0.201   |

Values are least square mean ± SE. The P-values indicate comparisons of changes between Ipra group and Control group according to ANCOVA adjusted for factors below.

Model 1: adjusted for sex

Model 2: adjusted for sex and total daily dose of insulin at registration

Model 3: adjusted for sex and total daily dose of insulin at 0 weeks

Model 4: adjusted for sex and total daily dose of insulin at 24 weeks

Model 5: adjusted for sex and change in total daily dose of insulin from 0 to 24 weeks
